# Supplementary material
Source: PubMed Central journal article supplement (PMC1134950)
Supplement: bj3870221add.pdf [file bj3870221add.pdf]

## SUPPLEMENTARY INFORMATION

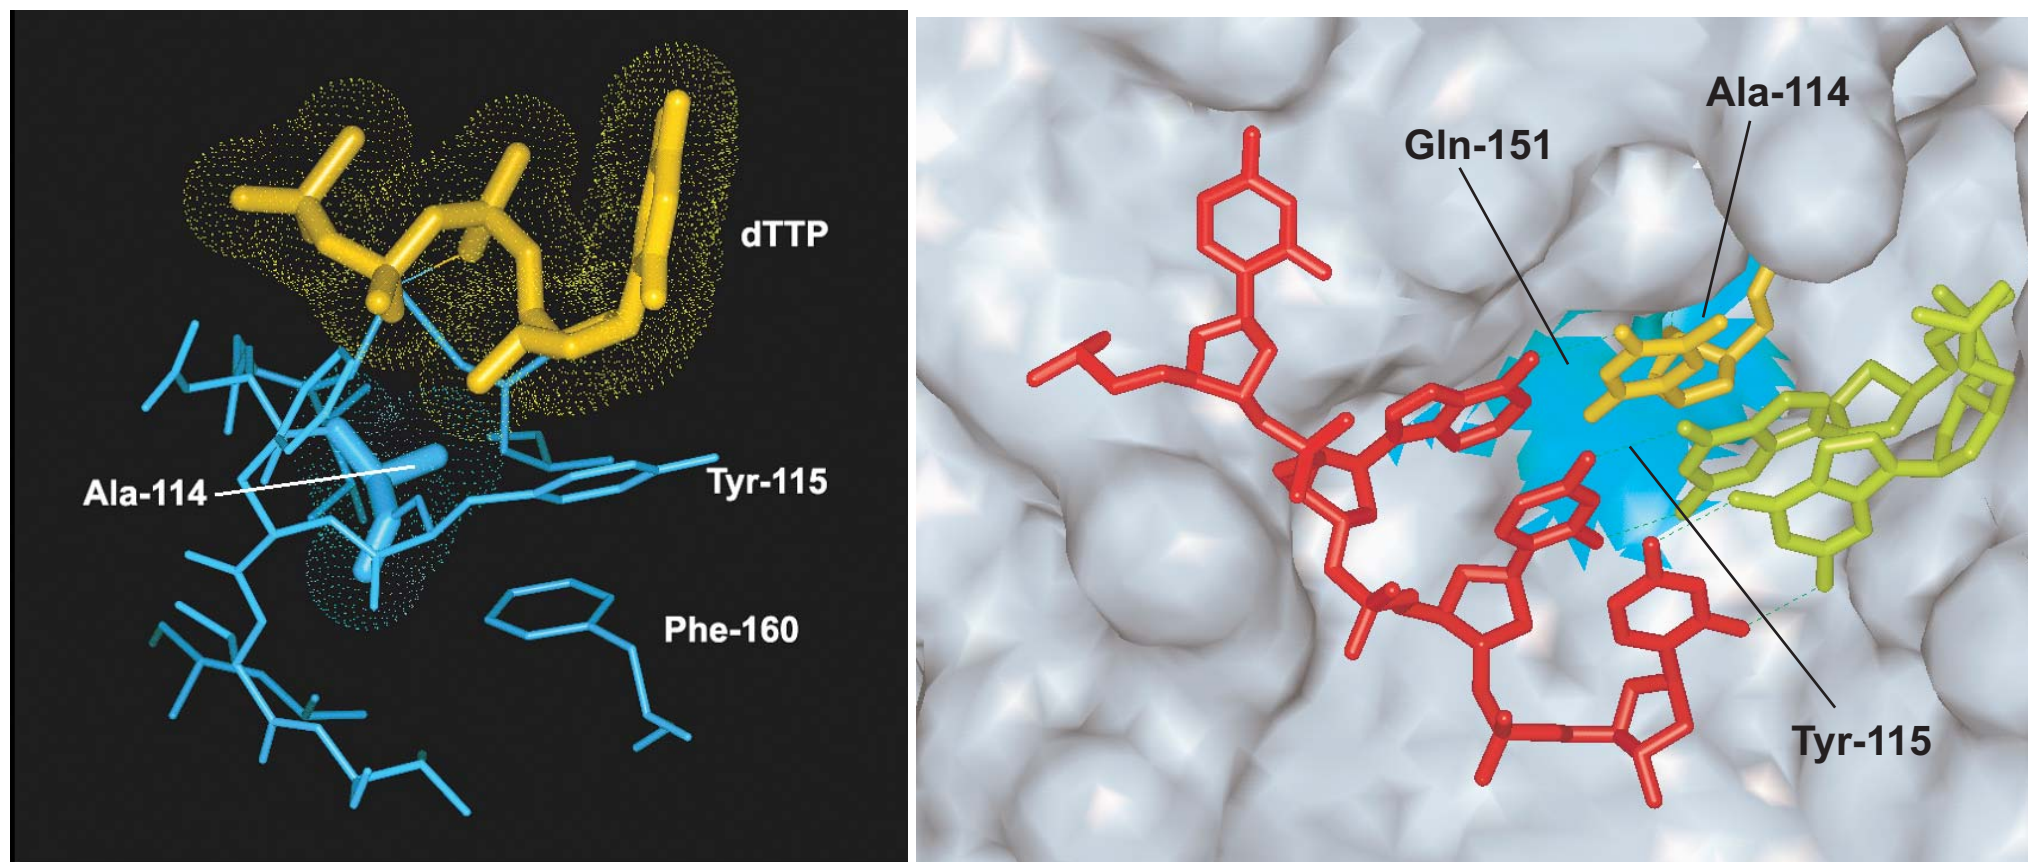

**Figure S1.** Location of Ala-114 within the dNTP binding site of HIV-1 RT. (Left) Stick representation showing the location of the incoming dNTP (yellow) and p66 residues in the vicinity of Ala-114 (Gly-112, Asp-113, Tyr-115, Tyr-116, Gln-151, and Phe-160) (blue). Van der Waals surface representations for Ala-114 and the dTTP are also shown. (Right) Connolly surface representation of the 'palm' subdomain of HIV-1 RT, showing the location of Ala-114, Tyr-115 and Gln-151, at the bottom of the dNTP binding site (blue). Template residues are shown in red, primer residues in green, and the incoming dNTP in yellow. Figures were prepared with the program Insight II version 98.0 (Accelrys) using the Brookhaven Protein Data Bank coordinates 1RTD, obtained from the crystal structure of the ternary complex of HIV-1 RT·DNA/DNA·dTTP [13].
